# Supplementary material for: Analyzing Large Gene Expression and Methylation Data Profiles Using StatBicRM: Statistical Biclustering-Based Rule Mining
Source: PubMed Central journal article supplement (PMC4382191; doi:10.1371/journal.pone.0119448), 2015-04-01
Supplement: pone.0119448.s002.pdf [file pone.0119448.s002.pdf]

TABLE I: Top 15 association rules of treated and control class labels from the results of average ranking for (a) Dataset 1, (b) Dataset 2 and (c) Dataset 3; here ‘+’ denotes up-regulation and ‘-’ denotes down-regulation for Dataset 1 and Dataset 2, where ‘+’ denotes hyper-methylation and ‘-’ denotes hypo-methylation for Dataset 3.

(a)

|                                                            |
|------------------------------------------------------------|
| {BNC1+, KRT13+, SERPINB13+, SPRR1A+, ⇒ class=SCC}          |
| {BNC1+, KRT13+, SERPINB13+, CMTM8- ⇒ class=SCC}            |
| {BNC1+, SERPINB13+ ⇒ class=SCC}                            |
| {SPRR1A+, ATP11A- ⇒ class=SCC}                             |
| {SPRR1A+, ATP11A-, SUL1A2- ⇒ class=SCC}                    |
| {ATP11B+, BNC1+, CHST7+, KRT16+, SERPINB13+ ⇒ class=SCC}   |
| {SERPINB13+, ABHD14A-, CMTM8- ⇒ class=SCC}                 |
| {SERPINB13+, COL7A1+, CMTM8- ⇒ class=SCC}                  |
| {ACAP2+, SERPINB13+, ⇒ class=SCC}                          |
| {KRT14+, ATP11A-, SHROOM3- ⇒ class=SCC}                    |
| {ATP11A-, CMTM8-, SHROOM3- ⇒ class=SCC}                    |
| {SPRR1A+, SPSB2- ⇒ class=SCC}                              |
| {SERPINB13+, CMTM8- ⇒ class=SCC}                           |
| {SPRR1A+, EPS8L2- ⇒ class=SCC}                             |
| {BNC1+, KRT13+, SERPINB13+, ATP11A-, SHROOM3- ⇒ class=SCC} |

(b)

|                                                |
|------------------------------------------------|
| {JAG1-, PECAM1- ⇒ class=tumor}                 |
| {FLJ10986+, CDC34+ ⇒ class=tumor}              |
| {MCM4+, KRT17+ ⇒ class=tumor}                  |
| {ZNF217+, ACSL5+ ⇒ class=normal}               |
| {TIGD7+, CDC34+ ⇒ class=tumor}                 |
| {JAG1-, FBXO33-, NUAK1-, PSCD1- ⇒ class=tumor} |
| {PRL+, TDO2+, EGFL6+ ⇒ class=tumor}            |
| {JAG1-, PPP2R2B-, SASH1- ⇒ class=tumor}        |
| {CDC34+, PRKCH- ⇒ class=tumor}                 |
| {PRL+, NUAK1- ⇒ class=tumor}                   |
| {PRL+, TRPC6+ ⇒ class=tumor}                   |
| {AOX1+, GSTA4- ⇒ class=normal}                 |
| {MCM4+, PRL+ ⇒ class=tumor}                    |
| {PRRG1+, ACSL5+ ⇒ class=normal}                |
| {FBXO33-, PPP2R2B- ⇒ class=tumor}              |

(c)

|                                        |
|----------------------------------------|
| {KLF11+, STEAP4+ ⇒ class=tumor}        |
| {ZMYND15+, C11orf38- ⇒ class=tumor}    |
| {SLC15A3+, APOB+ ⇒ class=tumor}        |
| {ACTN2+, CALCRL+ ⇒ class=tumor}        |
| {STEAP4+, DLEC1+, APOB+ ⇒ class=tumor} |
| {CST9L+, S100A16+ ⇒ class=normal}      |
| {KLF11+, IL20RA+ ⇒ class=tumor}        |
| {C1orf115+, ZMYND15+ ⇒ class=tumor}    |
| {INHBE-, LYZL2- ⇒ class=normal}        |
| {DLEC1+, APOB+ ⇒ class=tumor}          |
| {DLEC1+, TRPM2- ⇒ class=tumor}         |
| {MGC16291-, SMPD2- ⇒ class=tumor}      |
| {TRPM2-, SMPD2- ⇒ class=tumor}         |
| {CST9L+, NODAL- ⇒ class=normal}        |
| {C11orf38-, TEX101- ⇒ class=tumor}     |
